# Supplementary material for: Germplasm Enhancement with the First Medicinal Crop-Varieties for Prevention and Management of Cancer and Diabetes in Bitter Gourd (Momordica charantia)
Source: Research Square preprint supplement (doi:10.21203/rs.3.rs-8161039/v1), 2025-11-28
Supplement: Supplementary file 1 [file e0f76b3c35d264127cfbd8f1.docx]

**Supplementary Table 1** Mean contents (mg/g) of Cucurbitacin-B (CCR), Charantin (CHR) and Plant Insulin (PLIN) in lyophilised powder of fresh fruits and mean fresh fruit weight (FR WT) over three replications among 25 bitter gourd varieties in an enhanced germplasm.

| **Genotype** | | **Origin** | | **CCR** | | **Rank** | | **CHR** | | **Rank** | | **PLIN** | | **Rank** | | **FR WT** | | **Rank** | |
| --- | --- | --- | --- | --- | --- | --- | --- | --- | --- | --- | --- | --- | --- | --- | --- | --- | --- | --- | --- |
| ***M.c.* var. *muricara*** | |  | |  | |  | |  | |  | |  | |  | |  | |  | |
| CBM3 | | USA | | 0.360 | | cdefg | | 7.470 | | abc | | 0.260 | | bc | | 41.67 | | e | |
| CBM6 | | USA | | 0.420 | | bcde | | 6.455 | | cdef | | 0.185 | | de | | 33.13 | | ef | |
| CBM10 | | USA | | 0.645 | | a | | 7.580 | | abc | | 0.190 | | de | | 4.90 | | h | |
| CBM12 | | USA | | 0.435 | | bcd | | 7.880 | | ab | | 0.260 | | bc | | 3.84 | | h | |
| CBM13 | | USA | | 0.500 | | b | | 6.590 | | bcdef | | 0.210 | | cd | | 30.20 | | ef | |
| CBM18 | | USA | | 0.465 | | bc | | 7.305 | | abcd | | 0.205 | | cd | | 5.89 | | h | |
| CBMH10* | | USA | | 0.615 | | a | | 8.000 | | a | | 0.400 | | a | | 64.47 | | d | |
| CBMH12* | | USA | | 0.365 | | cdefg | | 7.600 | | abc | | 0.300 | | b | | 74.36 | | bcd | |
| Hybrid India Star | | India | | 0.150 | | ijk | | 4.200 | | g | | 0.110 | | f | | 74.83 | | bcd | |
| Hybrid India Baby | | India | | 0.400 | | bcdef | | 7.100 | | abcde | | 0.160 | | def | | 4.28 | | h | |
| Hybrid India Pearl | | India | | 0.210 | | hijk | | 6.950 | | abcde | | 0.160 | | def | | 72.26 | | bcd | |
| India Long Green | | India | | 0.330 | | defgh | | 6.420 | | cdef | | 0.140 | | ef | | 22.64 | | fg | |
| Hybrid India Green Queen | | India | | 0.300 | | efgh | | 7.435 | | abc | | 0.140 | | ef | | 25.29 | | fg | |
| Japan Green Spindle | | Japan | | 0.350 | | cdefg | | 6.950 | | abcde | | 0.140 | | ef | | 16.10 | | gh | |
| Japan Long | | Japan | | 0.240 | | ghijk | | 7.270 | | abcd | | 0.170 | | def | | 78.69 | | bc | |
| Small Baby | | Thailand | | 0.410 | | bcdef | | 6.420 | | cdef | | 0.130 | | ef | | 3.48 | | h | |
| Hybrid Baby Doll | | Thailand | | 0.290 | | fgh | | 5.370 | | f | | 0.130 | | ef | | 5.10 | | h | |
| ***M.c.* var. *charanria*** | |  | |  | |  | |  | |  | |  | |  | |  | |  | |
| Hybrid Beauty Winner | | China | | 0.150 | | ijk | | 7.480 | | abc | | 0.120 | | f | | 74.81 | | bcd | |
| Large Top | | China | | 0.270 | | ghi | | 7.160 | | abcde | | 0.130 | | ef | | 83.87 | | b | |
| Hong Kong Green | | Hong Kong | | 0.150 | | ijk | | 7.120 | | abcde | | 0.115 | | f | | 70.61 | | cd | |
| Hybrid Jumbo | | Thailand | | 0.260 | | ghij | | 7.460 | | abc | | 0.130 | | ef | | 70.87 | | cd | |
| Hybrid Bangkok Large | | Thailand | | 0.150 | | ijk | | 7.260 | | abcd | | 0.110 | | f | | 78.50 | | bc | |
| Hybrid White Pearl | | Taiwan | | 0.120 | | k | | 7.440 | | abc | | 0.170 | | def | | 82.37 | | bc | |
| Hybrid Taiwan White | Taiwan | | 0.140 | | jk | | 5.850 | | ef | | 0.110 | | f | | 63.600 | | d | |
| Taiwan White | Taiwan | | 0.130 | | k | | 5.985 | | def | | 0.115 | | f | | 146.33 | | a | |
|  |  | |  | |  | |  | |  | |  | |  | |  | |  | |
| **F-Value** |  | | 15.21 | |  | | 4.82 | |  | | 15.76 | |  | |  | |  | |
| **p-value** |  | | 1.15e-09 *** | |  | | 0.000107 *** | |  | | 7.72e-10 *** | |  | |  | |  | |
| **SE(m)** |  | | 0.038 | |  | | 0.389 | |  | | 0.018 | |  | |  | |  | |
| **CV%** |  | | 17.27 | |  | | 7.98 | |  | | 14.56 | |  | |  | |  | |

**M.c.* *charantia* × *M.c.* *muricata* hybrids (see methods for details)

**Supplementary Table 2** Correlation of contents of Cucurbitacin-B (CCR-B), Charantin (CHR) and Plant Insulin (PLIN) *inter se* and with Fruit Weight (Fr Wt) among 25 bitter gourd varieties in an enhanced germplasm.

|  | |  |  |  |  |
| --- | --- | --- | --- | --- | --- |
|  | |  |  |  |  |
|  | | CCR-B | CHR | PLIN | Fr Wt |
| CCR-B | Pearson Correlation | 1 | .362 | .672** | -.650** |
| Sig. (2-tailed) |  | .076 | .000 | .000 |
| N | 25 | 25 | 25 | 25 |
| CHR | Pearson Correlation | .362 | 1 | .518** | -.083 |
| Sig. (2-tailed) | .076 |  | .008 | .695 |
| N | 25 | 25 | 25 | 25 |
| PLIN | Pearson Correlation | .672** | .518** | 1 | -.150 |
| Sig. (2-tailed) | .000 | .008 |  | .473 |
| N | 25 | 25 | 25 | 25 |
| Fr Wt | Pearson Correlation | -.650** | -.083 | -.150 | 1 |
| Sig. (2-tailed) | .000 | .695 | .473 |  |
| N | 25 | 25 | 25 | 25 |
| **. Correlation is significant at the 0.01 level (2-tailed). | | | | | |

**Supplementary Figure 1**

**1(a) The parent varieties, CBM10 and Taiwan White, and their hybrid CBMH10**

**
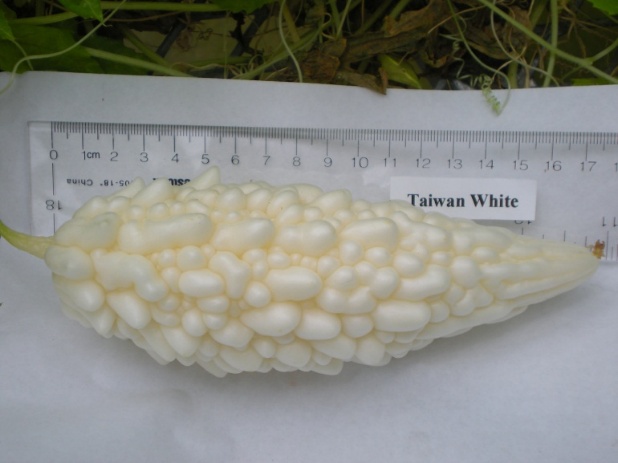

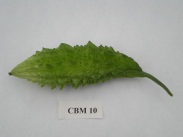
**

**
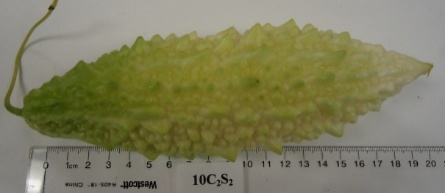
**

**1(b) The parent varieties, CBM12 and Taiwan White, and their hybrid CBMH12**

**
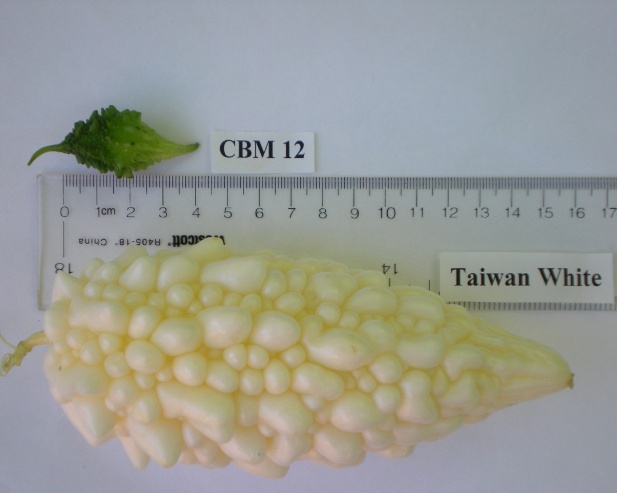

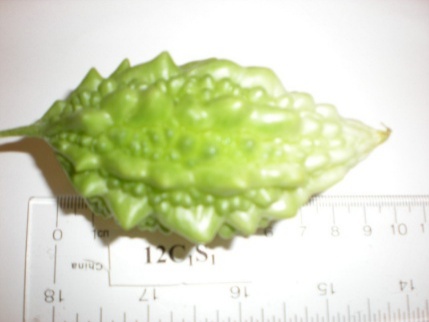
**
